# Supplementary material
Source: publisher site journal article supplement (https://kjim.org/upload/media/kjim-2023-265-Supplementary-Table-2.pdf)
Supplement: Supplementary file 1 [file kjim-2023-265-Supplementary-Table-2.pdf]

**Supplementary Table 2. Charlson's Comorbidity Index**

| Score | Conditions                                                                                                                                                                                                                                                                                                                                                                                                                                                                                                          |
|-------|---------------------------------------------------------------------------------------------------------------------------------------------------------------------------------------------------------------------------------------------------------------------------------------------------------------------------------------------------------------------------------------------------------------------------------------------------------------------------------------------------------------------|
| 1     | Myocardial infarction (history, not just ECG changes only)<br>Congestive heart failure (history)<br>Peripheral vascular disease (includes peripheral arterial occlusive disease, aortic aneurysm)<br>Cerebrovascular disease (transient ischemic attack or CVA with mild/no sequelae)<br>Dementia<br>Chronic pulmonary disease<br>Connective tissue disease<br>Peptic ulcer disease<br>Mild liver disease (includes chronic hepatitis)<br>Diabetes without complications (excludes diet/exercise-controlled status) |
| 2     | Hemiplegia<br>Moderate to severe renal disease<br>Diabetes with end-organ damage (retinopathy, neuropathy, nephropathy)<br>Tumor without metastasis                                                                                                                                                                                                                                                                                                                                                                 |
| 3     | Moderate or severe liver disease                                                                                                                                                                                                                                                                                                                                                                                                                                                                                    |
| 6     | AIDS (not just HIV positive)                                                                                                                                                                                                                                                                                                                                                                                                                                                                                        |

ECG, electrocardiogram; CVA, cerebrovascular accident; AIDS, acquired immune deficiency syndrome; HIV, human immunodeficiency virus.
